# Supplementary material for: Genome-Wide Investigation of G6PDH Gene in Strawberry: Evolution and Expression Analysis during Development and Stress
Source: MDPI journal article supplement (doi:10.3390/ijms23094728), 2022-04-25
Supplement: s1 [file s1]

**Table S1.** Primers for quantitative RT-PCR

| Gene name         | Forward primers (5' to 3')    | Reverse primers (5' to 3') | Product size (bp) |
|-------------------|-------------------------------|----------------------------|-------------------|
| qPCR-FaG6PDH-CY   | TCCTCCATCAGTATATCCA<br>TCT    | TACGAGTCCATCCA<br>CCAT     | 83                |
| qPCR-FaG6PDH-P1   | CTGGTCTGTATAGTTCTGA           | ATATGTTCCGAGGT<br>ATCG     | 114               |
| qPCR-FaG6PDH-P1.1 | GGTATCCAAGAGAGTTCCC<br>AGA    | ACTCCGACAGGTC<br>CACTACTAC | 193               |
| qPCR-FaG6PDH-P2   | TCTATCTATCTATTCCTCCA<br>A     | GGCTTCTCAACAAT<br>AACT     | 103               |
| qPCR-FaG6PDH-PO   | GATCAGTACGGAAATTGG<br>AGCCTAG | CCGCAGCAAAGTA<br>TGTGGGAGT | 114               |
| qPCR-FaACTIN      | CCAAGGCTAATCGTGAGA<br>AGA     | GTCGAGCACAATA<br>CCAGTAG   | 128               |

**Table S2.** RT-PCR relative expression results for heatmap

| Low temperature  | CY       | P1       | P1.1     | P2          | PO       |
|------------------|----------|----------|----------|-------------|----------|
| 0h               | 1        | 1        | 1        | 1           | 1        |
| 6h               | 2.098221 | 1.578033 | 0.381432 | 0.95871     | 0.331594 |
| 12h              | 3.578033 | 1.986685 | 0.760489 | 3.711569    | 0.546831 |
| 24h              | 1.635613 | 1.090896 | 0.301452 | 2.40605     | 0.220931 |
| 48h              | 4.672256 | 1.578741 | 0.725728 | 1.820288    | 0.511096 |
| High temperature | CY       | P1       | P1.1     | P2          | PO       |
| 0h               | 1        | 1        | 1        | 1           | 1        |
| 6h               | 8.515858 | 3.532212 | 4.580712 | 2.471118    | 4.013872 |
| 12h              | 2.566852 | 2.148743 | 8.607367 | 2.148943    | 4.076978 |
| 24h              | 6.928293 | 6.135743 | 10.2491  | 2.825169    | 8.574188 |
| 48h              | 5.666665 | 9.644355 | 10.367   | 2.393374    | 7.709657 |
| Drought          | CY       | P1       | P1.1     | P2          | PO       |
| 0h               | 1        | 1        | 1        | 1           | 1        |
| 1h               | 4.800995 | 0.509034 | 7.382793 | 9.624200289 | 7.147583 |
| 3h               | 23.42537 | 4.518897 | 9.764188 | 12.29711364 | 19.70969 |
| 6h               | 26.78463 | 2.472265 | 12.79493 | 19578048064 | 17.20694 |
| 12h              | 32       | 0.729932 | 23.33618 | 24.94848793 | 15.11071 |
| Salt             | CY       | P1       | P1.1     | P2          | PO       |

|     |          |          |          |          |          |
|-----|----------|----------|----------|----------|----------|
| 0h  | 1        | 1        | 1        | 1        | 1        |
| 12h | 9.063071 | 5.907305 | 5.184363 | 19.29293 | 12.79493 |
| 24h | 3.08086  | 4.74311  | 5.005381 | 6.634556 | 2.876205 |
| 48h | 2.163449 | 5.118898 | 2.246221 | 2.514027 | 5.404521 |
| 72h | 1.313422 | 5.107085 | 1.61049  | 2.596677 | 1.389116 |
| ABA | CY       | P1       | P1.1     | P2       | PO       |
| 0h  | 1        | 1        | 1        | 1        | 1        |
| 6h  | 3.111262 | 2.857988 | 7.146763 | 5.61778  | 3.111262 |
| 12h | 6.206149 | 4.062872 | 1.084853 | 3.470547 | 2.483716 |
| 24h | 8.073382 | 2.804027 | 1.607702 | 4.272262 | 1.433955 |
| 48h | 3.254645 | 2.857988 | 4.773343 | 1.747146 | 1.774608 |
| GA  | CY       | P1       | P1.1     | P2       | PO       |
| 0h  | 1        | 1        | 1        | 1        | 1        |
| 6h  | 2.508527 | 1.398778 | 3.531536 | 4.648182 | 1.005212 |
| 12h | 5.470838 | 3.649971 | 3.300078 | 6.568461 | 2.589188 |
| 24h | 6.105037 | 4.821079 | 0.851159 | 4.250109 | 1.287882 |
| 48h | 4.041958 | 3.386981 | 1.558329 | 2.938337 | 1.438934 |
| SA  | CY       | P1       | P1.1     | P2       | PO       |
| 0h  | 1        | 1        | 1        | 1        | 1        |
| 6h  | 7.235035 | 4.2      | 4.126232 | 4.295607 | 1.368409 |
| 12h | 3.611254 | 1.577347 | 5.491538 | 4.198867 | 0.933033 |
| 24h | 4.301978 | 2.066945 | 4.084049 | 2.321408 | 1.394744 |
| 48h | 7.260153 | 5.32033  | 2.341609 | 3.116658 | 1.176907 |
